# Supplementary material for: Room-temperature synthesis of blue-emissive zero-dimensional cesium indium halide quantum dots for temperature-stable down-conversion white light-emitting diodes with a half-lifetime of 186 h
Source: Royal Society of Chemistry journal article supplement (doi:10.1039/d1mh01370j), 2021-01-01
Supplement: d1mh01370j1.pdf [file d1mh01370j1.pdf]

## Supplementary Information

### **Room-temperature synthesis of blue-emissive zero-dimensional cesium indium halide quantum dots for temperature-stable down-conversion white light-emitting diodes with a half-lifetime of 186 h**

Fei Zhang, Xinzhen Ji, Wenqing Liang, Ying Li, Zhuangzhuang Ma, Meng Wang, Yue Wang, Di Wu, Xu Chen\*, Dongwen Yang, Xinjian Li, Chongxin Shan and Zhifeng Shi\*

Key Laboratory of Materials Physics of Ministry of Education, School of Physics and Microelectronics, Zhengzhou University, Zhengzhou 450052, China

\*Corresponding author. E-mail: shizf@zzu.edu.cn; xchen@zzu.edu.cn

**Table S1** Comparison of synthesis methods, morphology, size and PLQY of Cs<sub>3</sub>InBr<sub>6</sub> QDs and other In-based halide materials.

| Compound                                                                                        | Method                          | Morphology     | Size    | PLQY  | Ref.             |
|-------------------------------------------------------------------------------------------------|---------------------------------|----------------|---------|-------|------------------|
| Cs <sub>3</sub> InBr <sub>6</sub>                                                               | M-LARP                          | QDs            | 4.5 nm  | 46%   | <b>This work</b> |
| Cs <sub>3</sub> InBr <sub>6</sub>                                                               | Hot-injection method            | Hollow NCs     | 20.5 nm | 22.3% | [1]              |
| (C <sub>6</sub> H <sub>5</sub> CH <sub>2</sub> NH <sub>3</sub> ) <sub>3</sub> InBr <sub>6</sub> | Hydrothermal method             | Single crystal | ~1 cm   | 35%   | [2]              |
| Cs <sub>2</sub> InBr <sub>5</sub> ·H <sub>2</sub> O                                             | Hydrothermal method             | Single crystal | ~2 mm   | 33%   | [3]              |
| Cs <sub>2</sub> InCl <sub>5</sub> ·H <sub>2</sub> O                                             | Low temperature crystallization | Single crystal | ~6 mm   | 18%   | [4]              |
| Cs <sub>2</sub> InCl <sub>2.5</sub> Br <sub>2.5</sub> ·H <sub>2</sub> O                         | Hydrothermal method             | Single crystal | -       | 24.4% | [5]              |
| Cs <sub>2</sub> InBr <sub>4</sub> I·H <sub>2</sub> O                                            | Hydrothermal method             | Single crystal | -       | 1%    | [5]              |
| Rb <sub>2</sub> InCl <sub>5</sub> ·(H <sub>2</sub> O)                                           | Hydrothermal method             | Single crystal | -       | ~1%   | [6]              |
| Rb <sub>3</sub> InCl <sub>6</sub>                                                               | Sonication method               | Powder         | -       | -     | [7]              |
| (C <sub>4</sub> H <sub>14</sub> N <sub>2</sub> ) <sub>2</sub> In <sub>2</sub> Br <sub>10</sub>  | Solution-phase method           | Single crystal | -       | ~3%   | [8]              |

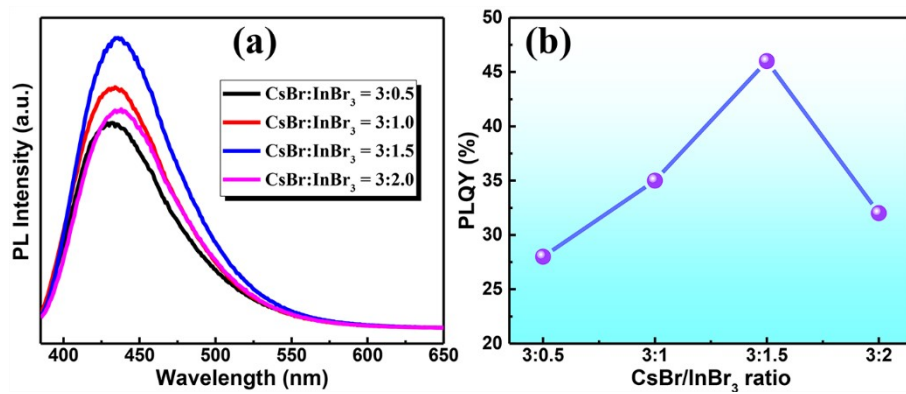

**Fig. S1** (a) PL spectra and (b) PLQYs of Cs<sub>3</sub>InBr<sub>6</sub> QDs synthesized under different CsBr/InBr<sub>3</sub> ratios, respectively.

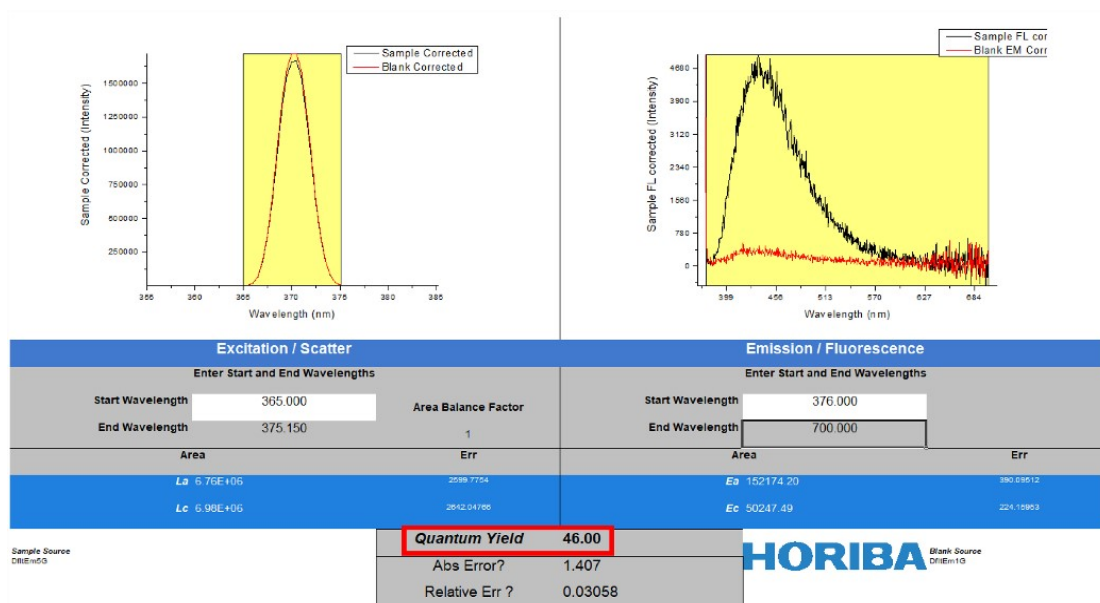

**Fig. S2** PLQY data of the Cs<sub>3</sub>InBr<sub>6</sub> QDs solution measured by integrating sphere.

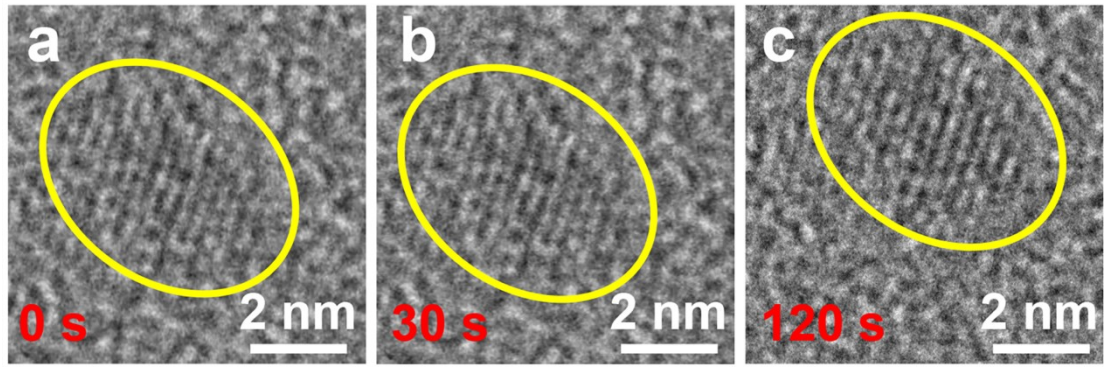

**Fig. S3** TEM images of the Cs<sub>3</sub>InBr<sub>6</sub> QDs continuously exposed to electron beam.

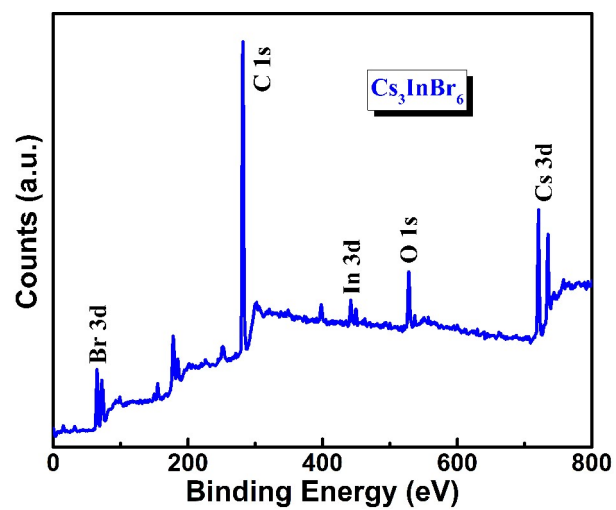

**Fig. S4** Total XPS spectrum of the Cs<sub>3</sub>InBr<sub>6</sub> QDs.

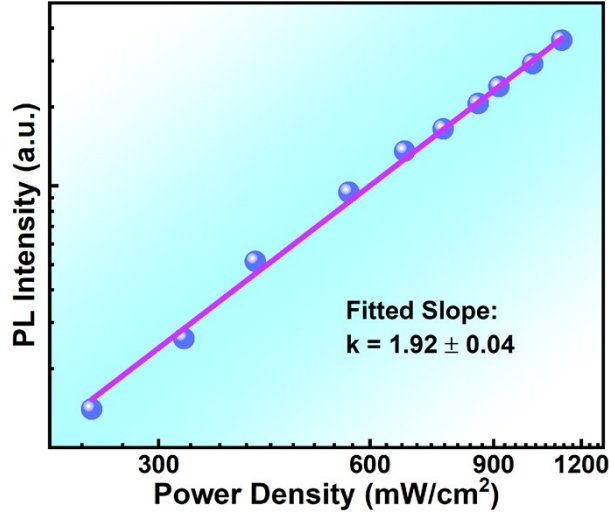

**Fig. S5** Integrated PL intensity of Cs<sub>3</sub>InBr<sub>6</sub> QDs as a function of excitation power density.

We further analyzed the slope of the fitted curve of the excitation-power-dependent PL emission intensity to determine the recombination kinetics. The dependence of the PL intensity  $I$  on the excitation power  $L$  can be estimated by the equation  $I \approx L^k$ , where  $k$  is an exponent between 0 and 2.40.<sup>9,10</sup> Generally,  $k = 2$  indicates recombination between a free electron and a hole,  $1 < k < 2$  corresponds to free or bound exciton decay, while  $k < 1$  correlates with impurity-related emission. As shown in Fig. S5, the plot of  $\log(I)$  vs  $\log(L)$  is linear with a slope of  $1.92 \pm 0.04$ , indicating the exciton transition. The excitation intensity dependence of emission is consistent with the bound and free exciton emission. Considering the broadband emission feature of Cs<sub>3</sub>InBr<sub>6</sub> QDs, the PL emission in Cs<sub>3</sub>InBr<sub>6</sub> is essentially excitonic and results from the recombination of bound excitons and multiphonon emission.

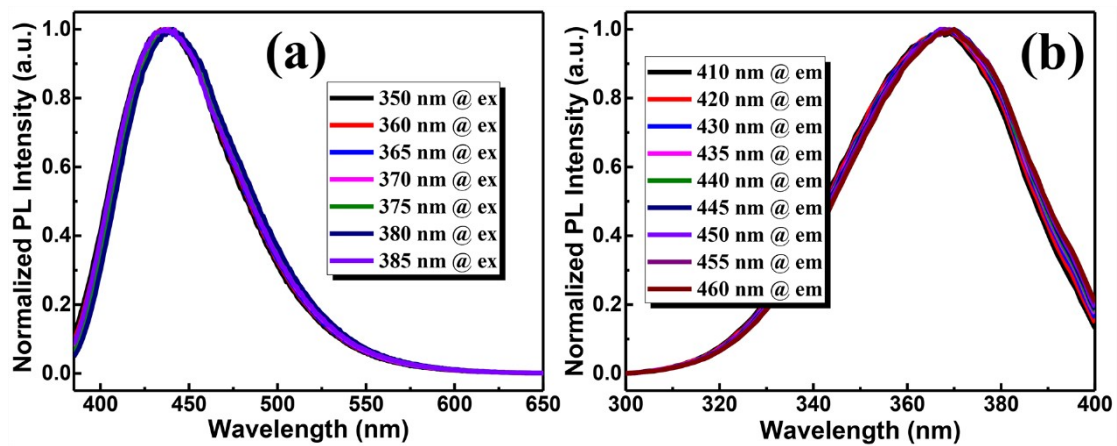

**Fig. S6** (a) Normalized PL spectra of Cs<sub>3</sub>InBr<sub>6</sub> QDs monitored at different excitation wavelengths. (b) Normalized PL excitation spectra of Cs<sub>3</sub>InBr<sub>6</sub> QDs monitored at different emission wavelengths.



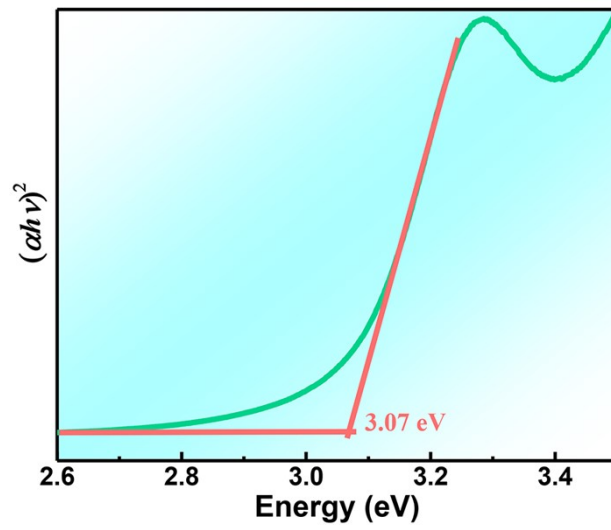

**Fig. S7** The bandgap of  $\text{Cs}_3\text{InBr}_6$  QDs determined from a Tauc plot of absorption spectrum.

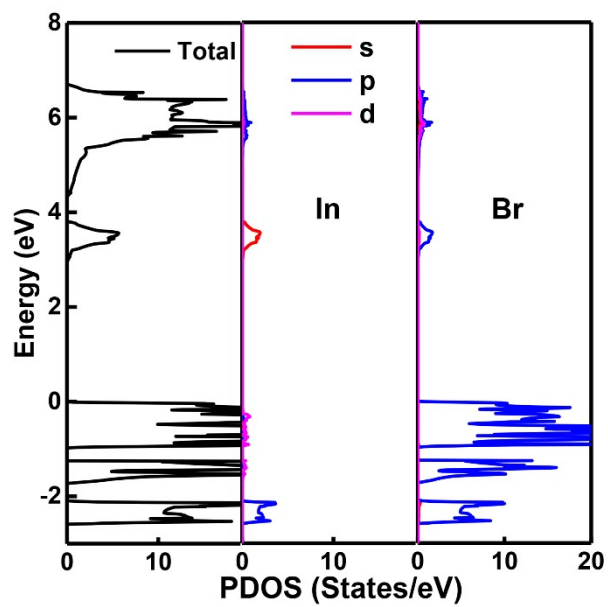

**Fig. S8** The predicted density of states (PDOS) of Cs<sub>3</sub>InBr<sub>6</sub> using PBE functional.

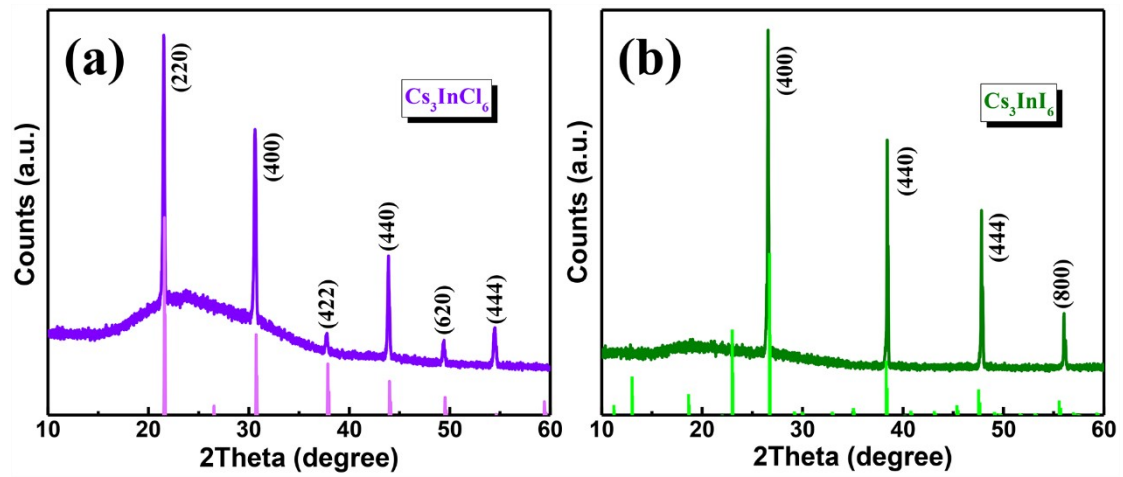

Fig. S9 XRD patterns of (a)  $\text{Cs}_3\text{InCl}_6$ , and (b)  $\text{Cs}_3\text{InI}_6$  QDs, respectively.

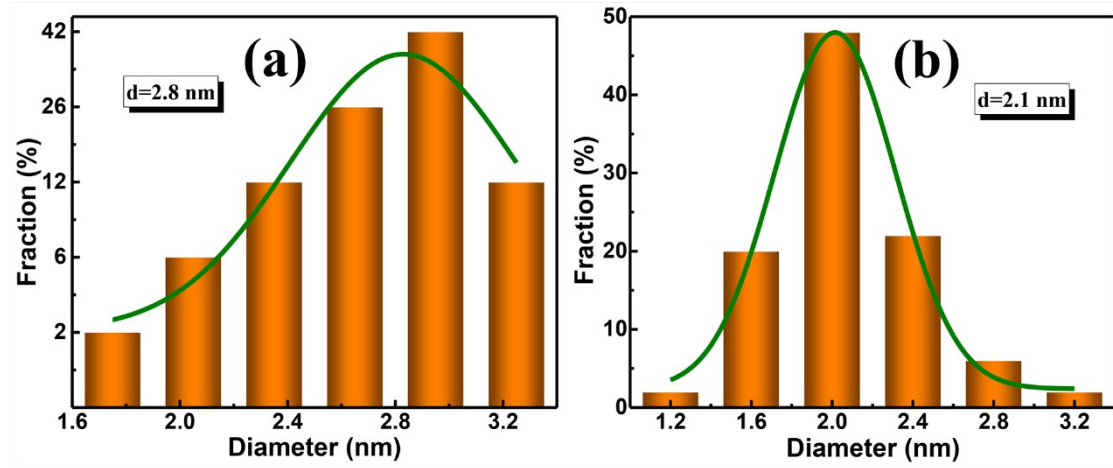

**Fig. S10** Size distribution histograms of (a)  $\text{Cs}_3\text{InCl}_6$ , and (b)  $\text{Cs}_3\text{InI}_6$  QDs, respectively.

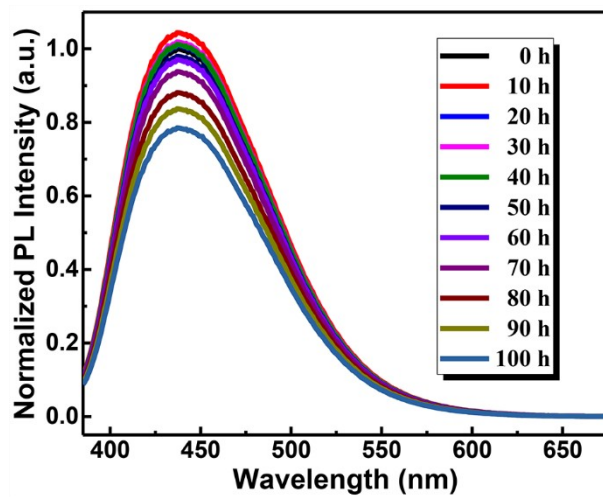

**Fig. S11** PL spectra evolution of the  $\text{Cs}_3\text{InBr}_6$  QDs under different UV light irradiation time.

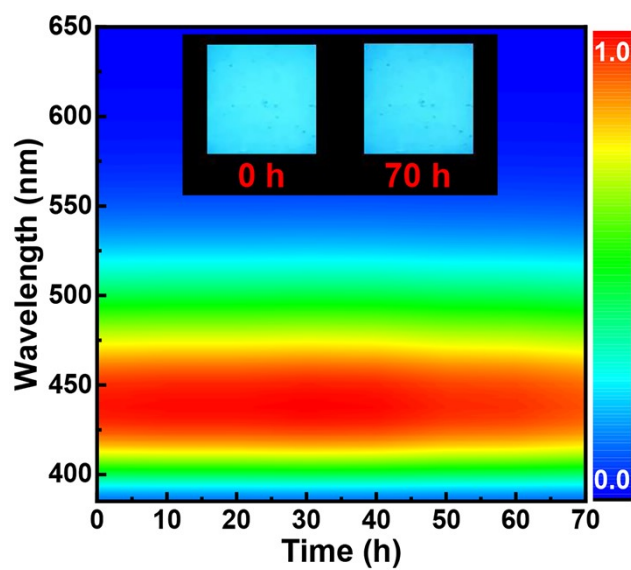

**Fig. S12** Stability test of the Cs<sub>3</sub>InBr<sub>6</sub> QDs film under continuous 365 nm UV lamp irradiation and high humidity (20–30 °C, 70–80% humidity) environment. The insets show the luminescence photos of the Cs<sub>3</sub>InBr<sub>6</sub> QDs film before and after treatment.

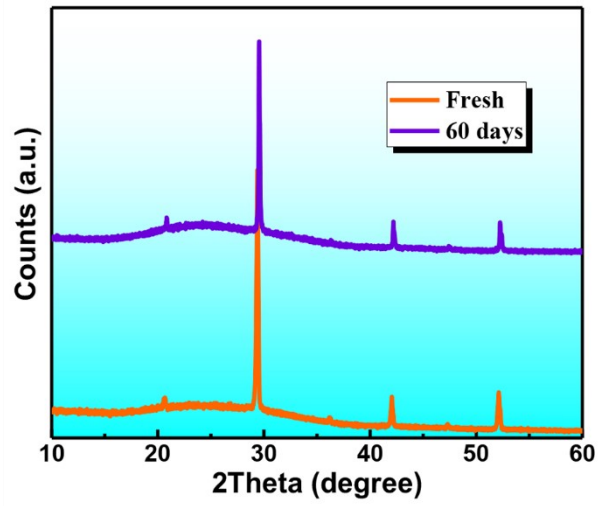

**Fig. S13** XRD results of the  $\text{Cs}_3\text{InBr}_6$  QDs film after storage in air ambient (20–35 °C, 50–60% humidity) for 60 days.

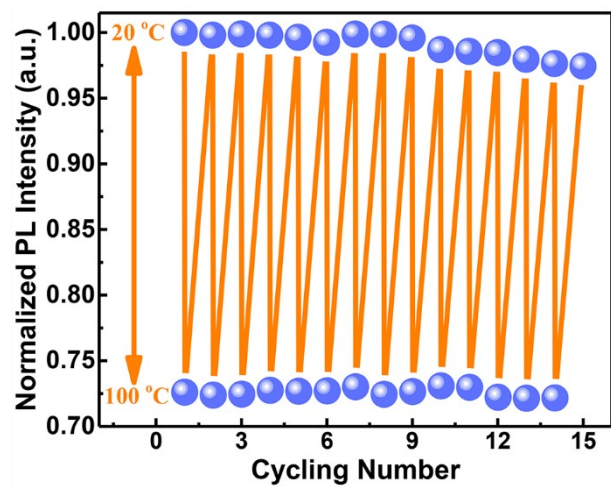

**Fig. S14** Plots of the normalized PL intensity of  $\text{Cs}_3\text{InBr}_6$  QDs at two typical temperature points (20 °C and 100 °C) over 15 heating/cooling cycles.



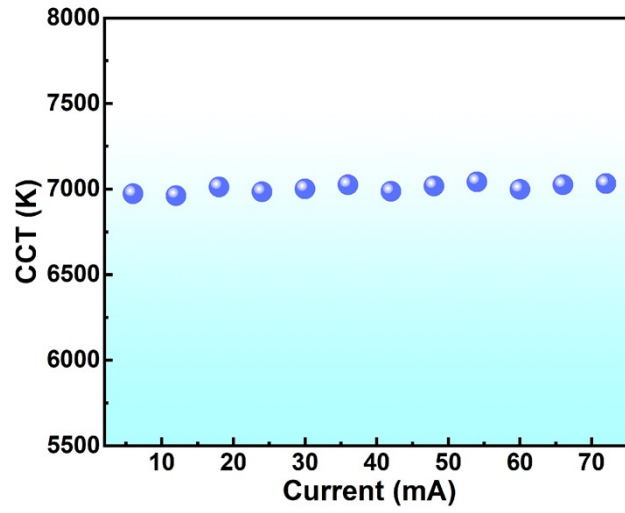

**Fig. S15** The corresponding color temperature (CCT) of the WLED under different driving currents.

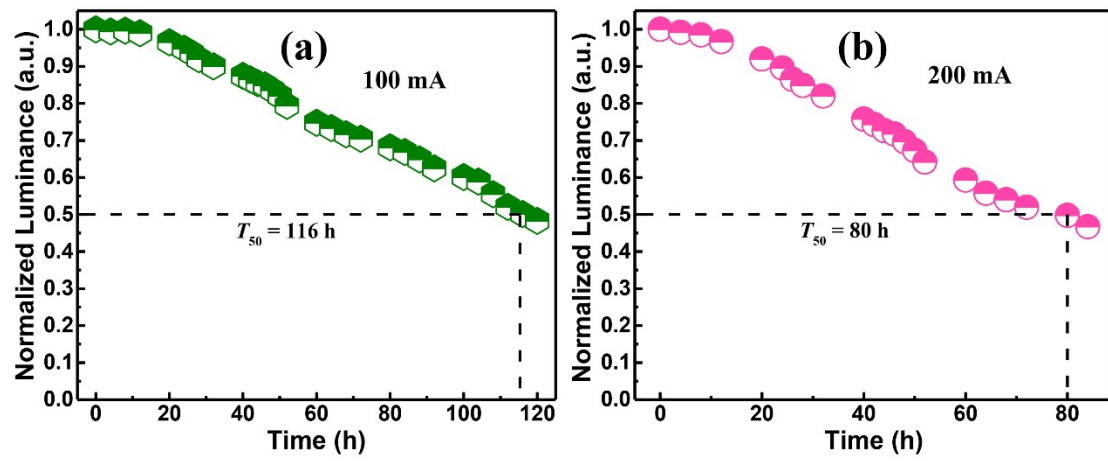

**Fig. S16** Emission intensity evolution of the WLED measured at the driving current of (a) 100 mA, and (b) 200 mA, respectively.

## References

- [1] F. Zhang, D. Yang, Z. Shi, C. Qin, M. Cui, Z. Ma, L. Wang, M. Wang, X. Ji, X. Chen, D. Wu, X. Li, L. Zhang and C. Shan, *Nano Today*, 2021, **38**, 101153.
- [2] D. Chen, S. Hao, G. Zhou, C. Deng, Q. Liu, S. Ma, C. Wolverton, J. Zhao and Z. Xia, *Inorg. Chem.*, 2019, **58**, 15602.
- [3] L. Zhou, J. F. Liao, Z. G. Huang, J. H. Wei, X. D. Wang, W. G. Li, H. Y. Chen, D. B. Kuang and C. Y. Su, *Angew. Chem. Int. Ed.*, 2019, **58**, 5277.
- [4] X. Liu, X. Xu, B. Li, Y. Liang, A. Li, H. Jiang and D. Xu, *CCS Chem.*, 2020, **2**, 216.
- [5] Y. Jing, Y. Liu, X. Jiang, M. S. Molokeev, Z. Lin and Z. Xia, *Chem. Mater.*, 2020, **32**, 5327.
- [6] P. Han, C. Luo, S. Yang, Y. Yang, W. Deng and K. Han, *Angew. Chem. Int. Ed.*, 2020, **59**, 12709.
- [7] J. D. Majher, M. B. Gray, T. Liu, N. P. Holzapfel and P. M. Woodward, *Inorg. Chem.*, 2020, **59**, 14478.
- [8] L. Zhou, J. F. Liao, Z. G. Huang, J. H. Wei, X. D. Wang, H. Y. Chen and D. B. Kuang, *Angew. Chem. Int. Ed.*, 2019, **58**, 15435.
- [9] T. Schmidt, K. Lischka and W. Zulehner, *Phys. Rev. B*, 1992, **45**, 8989.
- [10] X. Li, X. Lian, J. Pang, B. Luo, Y. Xiao, M. D. Li, X. C. Huang and J. Z. Zhang, *J. Phys. Chem. Lett.*, 2020, **11**, 8157.
